# Supplementary material for: Hyphoderma paramacaronesicum sp. nov. (Meruliaceae, Polyporales, Basidiomycota), a cryptic lineage to H. macaronesicum
Source: PubMed Central journal article supplement — Fungal Syst Evol. 2018 Aug 8;2:57–68. doi: 10.3114/fuse.2018.02.05 (PMC7225581; doi:10.3114/fuse.2018.02.05), 2018-08-08
Supplement: SF1.pdf [file SF1.pdf]

# Supplementary Fig. 1

SH191350.07FU

Statistics
Taxonomy
Ecology

## Distribution of distances

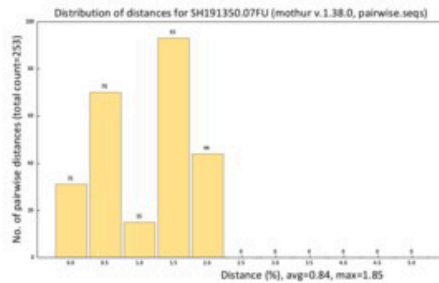

## Distribution map

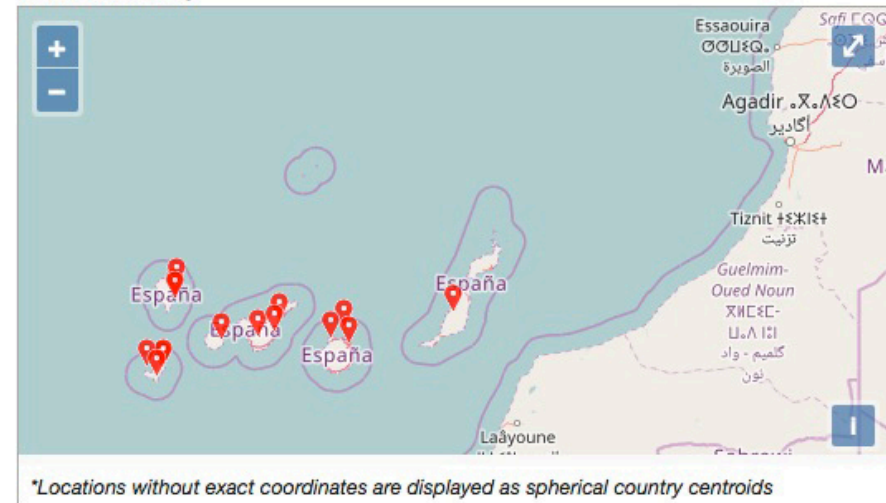

| Accession number | UNITE taxon name         | INSD taxon name | Sequence source         | Interacting taxa | Sampling area | %    |     |     |     |     | ← Alignment → |                                      |
|------------------|--------------------------|-----------------|-------------------------|------------------|---------------|------|-----|-----|-----|-----|---------------|--------------------------------------|
|                  |                          |                 |                         |                  |               | <0.5 | 0.5 | 1.0 | 1.5 | 2.0 |               | 2.5                                  |
| UDB017763        | Hyphoderma macaronesicum |                 | TFCMic.15856 (Specimen) |                  | Spain         |      |     |     |     |     |               | -----CATTAAATGAATTA AAAACAACGAGGTTGT |
| UDB017769        | Hyphoderma macaronesicum |                 | TFCMic.15903 (Specimen) |                  | Spain         |      |     |     |     |     |               | -----CATTAAATGAATTA AAAACAACGAGGTTGT |
| UDB017748        | Hyphoderma macaronesicum |                 | TFCMic.15115 (Specimen) |                  | Spain         |      |     |     |     |     |               | -----CATTAAATGAATTA AAAACAACGAGGTTGT |
| UDB017742        | Hyphoderma macaronesicum |                 | TFCMic.14970 (Specimen) |                  | Spain         |      |     |     |     |     |               | -----CATTAAATGAATTA AAAACAACGAGGTTGT |
| UDB017749        | Hyphoderma macaronesicum |                 | TFCMic.15123 (Specimen) |                  | Spain         |      |     |     |     |     |               | -----CATTAAATGAATTA AAAACAACGAGGTTGT |
| UDB017759(1)     | Hyphoderma macaronesicum |                 | TFCMic.15514 (Specimen) |                  | Spain         |      |     |     |     |     |               | -----CATTAAATGAATTA AAAACAACGAGGTTGT |
| UDB017764        | Hyphoderma macaronesicum |                 | TFCMic.15857 (Specimen) |                  | Spain         |      |     |     |     |     |               | -----CATTAAATGAATTA AAAACAACGAGGTTGT |
| UDB017737        | Hyphoderma macaronesicum |                 | TFCMic.8996 (Specimen)  |                  | Spain         |      |     |     |     |     |               | -----CATTAAATGAATTA AAAACAACGAGGTTGT |
| UDB017756        | Hyphoderma macaronesicum |                 | TFCMic.15439 (Specimen) |                  | Spain         |      |     |     |     |     |               | -----CATTAAATGAATTA AAAACAACGAGGTTGT |
| UDB017739(1)     | Hyphoderma macaronesicum |                 | TFCMic.14957 (Specimen) |                  | Spain         |      |     |     |     |     |               | -----CATTAAATGAATTA AAAACAACGAGGTTGT |
| UDB017746        | Hyphoderma macaronesicum |                 | TFCMic.15019 (Specimen) |                  | Spain         |      |     |     |     |     |               | -----CATTAAATGAATTA AAAACAACGAGGTTGT |
| UDB017738        | Hyphoderma macaronesicum |                 | TFCMic.9015 (Specimen)  |                  | Spain         |      |     |     |     |     |               | -----CATTAAATGAATTA AAAACAACGAGGTTGT |
| UDB017771        | Hyphoderma macaronesicum |                 | TFCMic.15939 (Specimen) |                  | Spain         |      |     |     |     |     |               | -----CATTAAATGAATTA AAAACAACGAGGTTGT |
| UDB017747        | Hyphoderma macaronesicum |                 | TFCMic.15032 (Specimen) |                  | Spain         |      |     |     |     |     |               | -----CATTAAATGAATTA AAAACAACGAGGTTGT |
| UDB017736(5)     | Hyphoderma macaronesicum |                 | TFCMic.8954 (Specimen)  |                  | Spain         |      |     |     |     |     |               | -----CATTAAATGAATTA AAAACAACGAGGTTGT |
| UDB017762        | Hyphoderma macaronesicum |                 | TFCMic.15824 (Specimen) |                  | Spain         |      |     |     |     |     |               | -----CATTAAATGAATTA AAAACAACGAGGTTGT |

# Supplementary Fig. 1

SH191352.07FU

[Statistics](#)
[Taxonomy](#)
[Ecology](#)

## Distribution of distances ⓘ

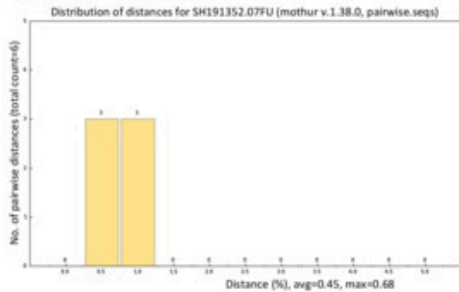

## Distribution map

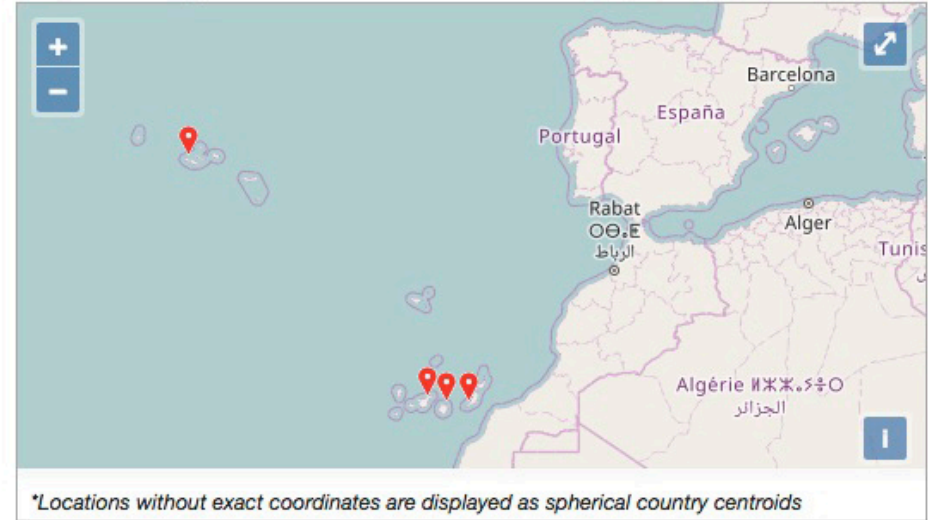

| Accession number | UNITE taxon name | INSD taxon name | Sequence source                           | Interacting taxa | Sampling area | % ⓘ  |     |     |     |     | ← Alignment → |                                                     |
|------------------|------------------|-----------------|-------------------------------------------|------------------|---------------|------|-----|-----|-----|-----|---------------|-----------------------------------------------------|
|                  |                  |                 |                                           |                  |               | <0.5 | 0.5 | 1.0 | 1.5 | 2.0 |               | 2.5                                                 |
| UDB017773        | Hyphoderma       |                 | TFCMic.15831 (Specimen) <a href="#">↗</a> |                  | Spain         |      |     |     |     |     |               | -----CATTAAATGAATTA AAAACAACATGGTTGTCGCTGGCCTGTATGG |
| UDB017775        | Hyphoderma       |                 | 16099Tell. (Specimen) <a href="#">↗</a>   |                  | Portugal      |      |     |     |     |     |               | -----CATTAAATGAATTA AAAACAACATGGTTGTCGCTGGCCTGTATGG |
| UDB017774        | Hyphoderma       |                 | TFCMic.15981 (Specimen) <a href="#">↗</a> |                  | Spain         |      |     |     |     |     |               | -----CATTAAATGAATTA AAAACAACATGGTTGTCGCTGGCCTGTATGG |
| UDB017772        | Hyphoderma       |                 | TFCMic.15161 (Specimen) <a href="#">↗</a> |                  | Spain         |      |     |     |     |     |               | -----CATTAAATGAATTA AAAACAACATGGTTGTCGCTGGCCTGTATGG |
