# Supplementary material for: Hyphoderma paramacaronesicum sp. nov. (Meruliaceae, Polyporales, Basidiomycota), a cryptic lineage to H. macaronesicum
Source: PubMed Central journal article supplement — Fungal Syst Evol. 2018 Aug 8;2:57–68. doi: 10.3114/fuse.2018.02.05 (PMC7225581; doi:10.3114/fuse.2018.02.05), 2018-08-08
Supplement: SF3.pdf [file SF3.pdf]

Supplementary  
Fig. 3A (ITS)

```

1         11        21        31        41        51        ]
|         |         |         |         |         |         |
12353MDclonADE CATTAAATGAATTAAAAACAACATGGTTGTCGCTGGCCTGTATGGGCATGTGCACGCCTTG
12353MDclonBCF CATTAAATGAATTAAAAACAACATGGTTGTCGCTGGCCTGTATGGGCATGTGCACGCCTTG
15939TFC       CATTAAATGAATTAAAAACAACGAGGTTGTCGCTGGCCTGTATGGGCATGTGCACGCCTTG

[         |         |         |         |         |         |         ]
|         |         |         |         |         |         |
12353MDclonADE TTAAATTCCTCCACACACCTCTGTGCACCATTTCATAGGTTGGCTCGTTTGATACGGTTTG
12353MDclonBCF TTAAATTCCTCCACACACCTCTGTGCACCATTTCATAGGTTGGCTCGTTTGATACGGTTTG
15939TFC       TTAAATTCCTCCACACACCTCTGTGCACCATTTCATAGGTTGGCTCGTTTGATACGGTTTG

[         |         |         |         |         |         |         ]
|         |         |         |         |         |         |
12353MDclonADE CTTTCTTCACTGGGAGCTGCCGTAGAGAGTCTCTCTATGCATTTTATTACAAACGTTTT
12353MDclonBCF CTTTCTTCACTGGGAGCTGCCGTAGAGAGTCTCTCTATGCATTTTATTACAAACGTTTT
15939TFC       CTTTCTTCACTGGGAGCTGCCGTAGAGAGTCTCTCTATGCATTTTATTACAAACGTTTT

[         |         |         |         |         |         |         ]
|         |         |         |         |         |         |
12353MDclonADE CAGTCTTTGAATGTACACCTGCGATATAAGCGCATTTAAATACAACCTTCAGCAACGGATC
12353MDclonBCF CAGTCTTTGAATGTACACCTGCGATATAAGCGCATTTAAATACAACCTTCAGCAACGGATC
15939TFC       CAGTCTTTGAATGTACACCTGCGATATAAGCGCATTTAAATACAACCTTCAGCAACGGATC

[         |         |         |         |         |         |         ]
|         |         |         |         |         |         |
12353MDclonADE TCTTGGCTCTCGCATCGATGAAGAACGCAGCGAAATGCGATAAGTAATGTGAATTGCAGA
12353MDclonBCF TCTTGGCTCTCGCATCGATGAAGAACGCAGCGAAATGCGATAAGTAATGTGAATTGCAGA
15939TFC       TCTTGGCTCTCGCATCGATGAAGAACGCAGCGAAATGCGATAAGTAATGTGAATTGCAGA

[         |         |         |         |         |         |         ]
|         |         |         |         |         |         |
12353MDclonADE ATTCAGTGAATCATCGAATCTTTGAACGCACCTTGCGCTCCTTGGTATTCCGAGGAGCAT
12353MDclonBCF ATTCAGTGAATCATCGAATCTTTGAACGCACCTTGCGCTCCTTGGTATTCCGAGGAGCAT
15939TFC       ATTCAGTGAATCATCGAATCTTTGAACGCACCTTGCGCTCCTTGGTATTCCGAGGAGCAT

[         |         |         |         |         |         |         ]
|         |         |         |         |         |         |
12353MDclonADE GCCTGTTTGAGTGTGCATGTAATCCTCAGCTCCCCCTGATTTTCTTTTGGGGGAAGCTGG
12353MDclonBCF GCCTGTTTGAGTGTGCATGTAATCCTCAGCTCCCCCTGATTTTCTTTTGGGGGAAGCTGG
15939TFC       GCCTGTTTGAGTGTGCATGTAATCCTCAGCTCCCCCGATTTTCTTCTGGGGGAAGCTGG

[         |         |         |         |         |         |         ]
|         |         |         |         |         |         |
12353MDclonADE ACTTGAGGTCTGCAGGTTCAATTCAGTTTGAATCAGCTCCTCTTAAATATATTAGTGTG
12353MDclonBCF ACTTGAGGTCTGCAGGTTCAATTCAGTTTGAATCAGCTCCTCTTAAATATATTAGTGTG
15939TFC       ACTTGAGGTCTGCAGGTTCAATTCAGTTTGAATCAGCTCCTCTTAAATGCATTAGTGTG

[         |         |         |         |         |         |         ]
|         |         |         |         |         |         |
12353MDclonADE GATGTTACCAAACGTTCTCCAGTGTGATAATTATCTGCGCTGCTGTGACTTTGGTATAGC
12353MDclonBCF GATGTTACCAAACGTTCTCCAGTGTGATAATTATCTGCGCTGCTGTGACTTTGGTATAGC
15939TFC       AATGTTGCAAACGTTCTCCAGTGTGATAATTATCTGCGCTGCTGTGACTTTGGTATAGC

[         |         |         |         |         |         |         ]
|         |         |         |         |         |         |
12353MDclonADE AATCGTTCATGCTTCCAAACGGTTCTCCATGGGAACAAAATAAACCTTTGCGTTTGACC
12353MDclonBCF AATCGTTCATGCTTCCAAACGGTTCTCCATGGGAACAAAATAAACCTTTGCGTTTGACC
15939TFC       AATCGTTCATGCTTCCAAACGGTTCTCCATGGGAACAAAATAAACCTTTGCGTTTGACC

[         |         |         |         |         |         |         ]
|         |         |         |         |         |         |
12353MDclonADE TCAAATCAGGTAGGACTACCCGCTGAACTTAAGCATATCAATAA
12353MDclonBCF TCAAATCAGGTAGGACTACCCGCTGAACTTAAGCATATCAATAA
15939TFC       TCAAATCAGGTAGGACTACCCGCTGAACTTAAGCATATCAATAA

```

Supplementary  
Fig. 3B (IGS)

|             |                                                               |     |     |     |     |     |   |
|-------------|---------------------------------------------------------------|-----|-----|-----|-----|-----|---|
| [           | 1                                                             | 11  | 21  | 31  | 41  | 51  | ] |
| [           |                                                               |     |     |     |     |     | ] |
| 12353MD     | GTTGGTCCCGCACATATAAGTTGTGTTAAAATAGAGCTTTGCTCGTGAACCAAATCAGGT  |     |     |     |     |     |   |
| 15939TFCmic | GTTGGTCCCGCACATATAAGTTGTGTTAAAATAGAGCTTTGCTCGTGAACCAAATCAGGT  |     |     |     |     |     |   |
|             |                                                               |     |     |     |     |     |   |
| [           | 61                                                            | 71  | 81  | 91  | 101 | 111 | ] |
| [           |                                                               |     |     |     |     |     | ] |
| 12353MD     | GGGCTGGGCCATTTGAGCGGAAATGCTGAGGTGGTTTGTCTACGAATTGAAATTATCATA  |     |     |     |     |     |   |
| 15939TFCmic | GGGCTGGGCCATTTGAGCGGAAATGCTTAGGTGGTTTGCCTACGAATTGAAATTATCATA  |     |     |     |     |     |   |
|             |                                                               |     |     |     |     |     |   |
| [           | 121                                                           | 131 | 141 | 151 | 161 | 171 | ] |
| [           |                                                               |     |     |     |     |     | ] |
| 12353MD     | TGCGCGGGGGTGAATCCTTTGCAGACGACTTGAATGGGAACGGGGTACTGTAAGCAGTAG  |     |     |     |     |     |   |
| 15939TFCmic | TGCGCGGGGGTGAATCCTTTGCAGACGACTTGAATGGGAACGGGGTACTGTAAGCAGTAG  |     |     |     |     |     |   |
|             |                                                               |     |     |     |     |     |   |
| [           | 181                                                           | 191 | 201 | 211 | 221 | 231 | ] |
| [           |                                                               |     |     |     |     |     | ] |
| 12353MD     | AGTAGCCTTGTTGCTACGATCTGCTGAGGTTAAGCCCTTGTTCTATAGATTTGTTCAACT  |     |     |     |     |     |   |
| 15939TFCmic | AGTAGCCTTGTTGCTACGATCTGCTGAGGTTAAGCCCTTGTTCTATAGATTTGTTGCGACT |     |     |     |     |     |   |
|             |                                                               |     |     |     |     |     |   |
| [           | 241                                                           | 251 | 261 | 271 | 281 | 291 | ] |
| [           |                                                               |     |     |     |     |     | ] |
| 12353MD     | TTTGTGAAACGCTTCTTTTCTTTTCTTTTCTTTTCCATGGTGCAACTTCAGGGCCGG     |     |     |     |     |     |   |
| 15939TFCmic | TTTGTGAAACGCTTCTTTTCTTTTCTTTTCTTTTCCATGGTGCAACTTCAGGGCCGG     |     |     |     |     |     |   |
|             |                                                               |     |     |     |     |     |   |
| [           | 301                                                           | 311 | 321 | 331 | 341 | 351 | ] |
| [           |                                                               |     |     |     |     |     | ] |
| 12353MD     | TCCATTTGAACTTGGTCTCTGGTTCACAATGCAAAGGCTGGGGCGAAGAGATTGAACGA   |     |     |     |     |     |   |
| 15939TFCmic | CCCATTTGGACTTGGTCTACTGGTTCACAATGCAAAGGCTGGTGCGGAGAGATTGAATGG  |     |     |     |     |     |   |
|             |                                                               |     |     |     |     |     |   |
| [           | 361                                                           | 371 | 381 | 391 | 401 | 411 | ] |
| [           |                                                               |     |     |     |     |     | ] |
| 12353MD     | TGGTTTCTTTTCTTTTCTTTTCTTTTCAAAAAGCCAGCGGGGATAAGGCATATAGGCCGG  |     |     |     |     |     |   |
| 15939TFCmic | TGGTTTCTTTTCTTTTCTTTTCTTTTCAAAAAGCCAGAGGGGATGAGGCATATAGGCCGTG |     |     |     |     |     |   |



Supplementary  
Fig. 3C (RPB2)

|            |                                                              |                                                       |                                     |                         |     |     |   |
|------------|--------------------------------------------------------------|-------------------------------------------------------|-------------------------------------|-------------------------|-----|-----|---|
|            | 1                                                            | 11                                                    | 21                                  | 31                      | 41  | 51  | ] |
| 12353MD    | CTTGTC                                                       | CACTTATGGCATGTATTTCTGT                                | CGGCTCCAAC                          | TCTGCGCCCGTCATCGAGTTCTT |     |     |   |
| 15810TFMic | CTTGTC                                                       | GCTTATGGCATGTATTTCTGT                                 | CGGCTCCAAT                          | TCTGCGCCCGTCATCGAGTTCTT |     |     |   |
| [          | 61                                                           | 71                                                    | 81                                  | 91                      | 101 | 111 | ] |
| 12353MD    | AGAGGAG                                                      | TGGGGTCTGGAGTCGTTGGAGGAGAATGCTCATGCCACAACGCCTTGTACGAA |                                     |                         |     |     |   |
| 15810TFMic | GGAGGAA                                                      | TGGGGTCTGGAGTCGTTGGAGGAGAATGCTCATGCCACAACGCCTTGTACGAA |                                     |                         |     |     |   |
| [          | 121                                                          | 131                                                   | 141                                 | 151                     | 161 | 171 | ] |
| 12353MD    | GGTATTCGTC                                                   | CAACGGCGTGTGGATGGGTGT                                 | ACACCGCGAC                          | CCTGCCAACTTGGTGAAGAC    |     |     |   |
| 15810TFMic | GGTATTCGTT                                                   | AACGGCGTGTGGATGGGTGT                                  | CCACCGTGAT                          | CCTGCCAATCTGGTAAAGAC    |     |     |   |
| [          | 181                                                          | 191                                                   | 201                                 | 211                     | 221 | 231 | ] |
| 12353MD    | TTTGAGGAAACTTCGTCGGAAGGACGATAT                               | CAGTCC                                                | TGAAGTTTCTGT                        | CGTCCGTGATAT            |     |     |   |
| 15810TFMic | TCTGAGGAAACTTCGTCGGAAGGACGATAT                               | TAGTCC                                                | GAAGTTTCTGT                         | TGTCCGTGATAT            |     |     |   |
| [          | 241                                                          | 251                                                   | 261                                 | 271                     | 281 | 291 | ] |
| 12353MD    | TCGAGAACGAGAGT                                               | TGCGGCTATATACCGACGCAGGACGCGTTTGCCGACCACTCTTTAT        |                                     |                         |     |     |   |
| 15810TFMic | TCGAGAACGAGA                                                 | ACTGCGGCTATATACCGACGCAGGACGCGTTTGCCGACCGCTCTTTAT      |                                     |                         |     |     |   |
| [          | 301                                                          | 311                                                   | 321                                 | 331                     | 341 | 351 | ] |
| 12353MD    | CGTCGAGGACCAGCAGCTTACGATCCGCAAGGCGCA                         | CATCCGGCAACTCCAAGCGAAAAT                              |                                     |                         |     |     |   |
| 15810TFMic | TGTCGAGGACCAGCAGCTTACGATCCGCAAGGCGCA                         | TATCCGGCAACTCCAAGCAAAAAT                              |                                     |                         |     |     |   |
| [          | 361                                                          | 371                                                   | 381                                 | 391                     | 401 | 411 | ] |
| 12353MD    | GGACGAACCGGAGAATCCTGCTATTCTGGATTT                            | CGGCTGGGATGAGCTCATAAAAGGCTGG                          |                                     |                         |     |     |   |
| 15810TFMic | GGACGAACCGGAGAATCCTGCTATTCTGGATTT                            | CGGCTGGGATGAGCTCATAAAAGCTGG                           |                                     |                         |     |     |   |
| [          | 421                                                          | 431                                                   | 441                                 | 451                     | 461 | 471 | ] |
| 12353MD    | TGTTATTGAGCTGTTGGACGCCGAAGAGGAGGAGACGGTCATGATATGTATGACTCCTGA |                                                       |                                     |                         |     |     |   |
| 15810TFMic | TGTCATTGAGCTGTTGGACGCCGAAGAGGAGGAGACGGTCATGATATGTATGACTCCTGA |                                                       |                                     |                         |     |     |   |
| [          | 481                                                          | 491                                                   | 501                                 | 511                     | 521 | 531 | ] |
| 12353MD    | CGACTTGGGAGAACTCGCGA                                         | TACAGTCTAGTGGAGTTGACCCGTATGCTGATACGGGTGA              |                                     |                         |     |     |   |
| 15810TFMic | CGACTTGGGAGAACTCGAGG                                         | TACAGTCTAGTGGAGTTGACCCGTATGCTGATACGGGTGA              |                                     |                         |     |     |   |
| [          | 541                                                          | 551                                                   | 561                                 | 571                     | 581 | 591 | ] |
| 12353MD    | TTTCGATCCTGCGGCGAGATTGAAGGCTGGTACCAATACCCATACGTGGACACATTGTGA |                                                       |                                     |                         |     |     |   |
| 15810TFMic | TTTCGATCCC                                                   | GCGGCAAGGTTGAAG                                       | CCTGGTACCAATACCCATACGTGGACACATTGTGA |                         |     |     |   |
| [          | 601                                                          | 611                                                   | 621                                 | 631                     | 641 | ]   |   |
| 12353MD    | GATTCACCC                                                    | CAGCATGATATTGGGTGTTTGC                                | GCGAGTATT                           |                         |     |     |   |
| 15810TFMic | GATTCACCC                                                    | TAGCATGATATTGGGTGTTTGC                                | GCGAGTATC                           |                         |     |     |   |



Supplementary  
Fig. 3D (EF1- $\alpha$ )

```

[      1      11      21      31      41      51      ]
[      |      |      |      |      |      |      ]
12353MD CAGAACATGATCACTGGTACCTCTCAGGCTGATTGCGCTATCCTCATCATCGCCGCCGGT
15939TFMic CAGAACATGATCACTGGTACATCTCAGGCCGATTGCGCTATCCTCATCATCGCCGCCGGT

[      61      71      81      91      101     111     ]
[      |      |      |      |      |      |      ]
12353MD ACCGGTGAGTTCGAGGCTGGTATCTCCAAGGACGGCCAGACTCGCGAGCACGCTCTCCTC
15939TFMic ACCGGTGAGTTCGAGGCTGGTATCTCCAAGGACGGCCAGACTCGCGAGCATGCTCTCCTC

[      121     131     141     151     161     171     ]
[      |      |      |      |      |      |      ]
12353MD GCCTTCACTCTTGGTGTCAAGGAGCTCATCGTTGCCATTAATAAGATGGATACCACCAAA
15939TFMic GCCTTCACTCTTGGTGTCAAGGAGCTCATCGTTGCCATTAATAAGATGGATACCACCAAA

[      181     191     201     211     221     231     ]
[      |      |      |      |      |      |      ]
12353MD GTCGGTTGTGAGAAATCTCATTGACCTGATTTACTGACAAATGCCCCAGTGGAGTGAGG
15939TFMic GTCGGTTGTGAGAAATCTCATTGACCTGATTTACTGACAAATGCCCCAGTGGAGTGAGG

[      241     251     261     271     281     291     ]
[      |      |      |      |      |      |      ]
12353MD ACCGCTTCAACGAAATCGTCAAGGAAACCTCTACCTTCATCAAGAAGGTCGGTTACAACC
15939TFMic ACCGCTTCAACGAAATCGTCAAGGAAACCTCTACCTTCATCAAGAAGGTCGGTTACAACC

[      301     311     321     331     341     351     ]
[      |      |      |      |      |      |      ]
12353MD CCAAGGCCGTTGGGTTTCGTCCTCATCTCTGGCTGGCACGGTGATAACATGTTGGAGGAGT
15939TFMic CCAAGGCCGTTGGGTTTCGTCCTCATCTCTGGCTGGCACGGTGATAACATGTTGGAGGAGT

[      361     371     381     391     401     411     ]
[      |      |      |      |      |      |      ]
12353MD CCGCCAAGTTCGTAGTGCGCTCTTTTCTTCATTGATCGCGCTAACCCTGACTGGCACAAA
15939TFMic CCGCCAAGTTCGTAGTGCGCTCTTTTCTTCATTGATCGCGCTAACCCTGACTGGCACAAA

[      421     431     441     451     461     471     ]
[      |      |      |      |      |      |      ]
12353MD CAGCATGACATGGTATAAGGGCTGGACCAAGGAGAACCAAGAGCGGTGTTGTCAAGGGCAA
15939TFMic CAGCATGACATGGTATAAGGGCTGGACCAAGGAGAACCAAGAGCGGTGTTGTCAAGGGCAA

[      481     491     501     511     521     531     ]
[      |      |      |      |      |      |      ]
12353MD GACCTTCTCGATGCTATTGATGCCATCGAACCTCCAGTTCGTCCCTCGGACAAACCTCT
15939TFMic GACCTTCTCGATGCTATTGATGCCATCGAACCTCCAGTTCGTCCCTCGGACAAACCTCT

[      541     551     561     571     581     591     ]
[      |      |      |      |      |      |      ]
12353MD CCGTCTCCCTCTCCAGGATGTTTACAAGATTGGTGGTATTGGGACGGTGCCCGTTGGTTCG
15939TFMic CCGTCTCCCTCTCCAGGATGTTTACAAGATTGGTGGTATTGGTACGGTGCCCGTTGGTTCG

[      601     611     621     631     641     651     ]
[      |      |      |      |      |      |      ]
12353MD TGTCGAAACTGGTATCATTAAAGTCTGGCATGGTCGTACCTTCGCTCCACCAACGTCAC
15939TFMic TGTCGAGACAGGTATCATTAAAGTCTGGTATGGTCGTACCTTCGCTCCACCAACGTCAC

[      661     671     681     691     701     711     ]
[      |      |      |      |      |      |      ]
12353MD CACCGAAGTCAAGTCCGTCGAGATGCATCACGAGCAGCTTGAGCAGGGTGTCCCAGGTGA
15939TFMic CACCGAAGTCAAGTCCGTCGAGATGCATCACGAGCAGCTTGAGCAGGGTGTCCCAGGTGA

[      721     ]
[      |     ]
12353MD CAA
15939TFMic CAA

```
