# Supplementary figures and images for: Hyphoderma paramacaronesicum sp. nov. (Meruliaceae, Polyporales, Basidiomycota), a cryptic lineage to H. macaronesicum
Source: PubMed Central journal article supplement — Fungal Syst Evol. 2018 Aug 8;2:57–68. doi: 10.3114/fuse.2018.02.05 (PMC7225581; doi:10.3114/fuse.2018.02.05), 2018-08-08

Supplementary Fig. 2A (ITS)

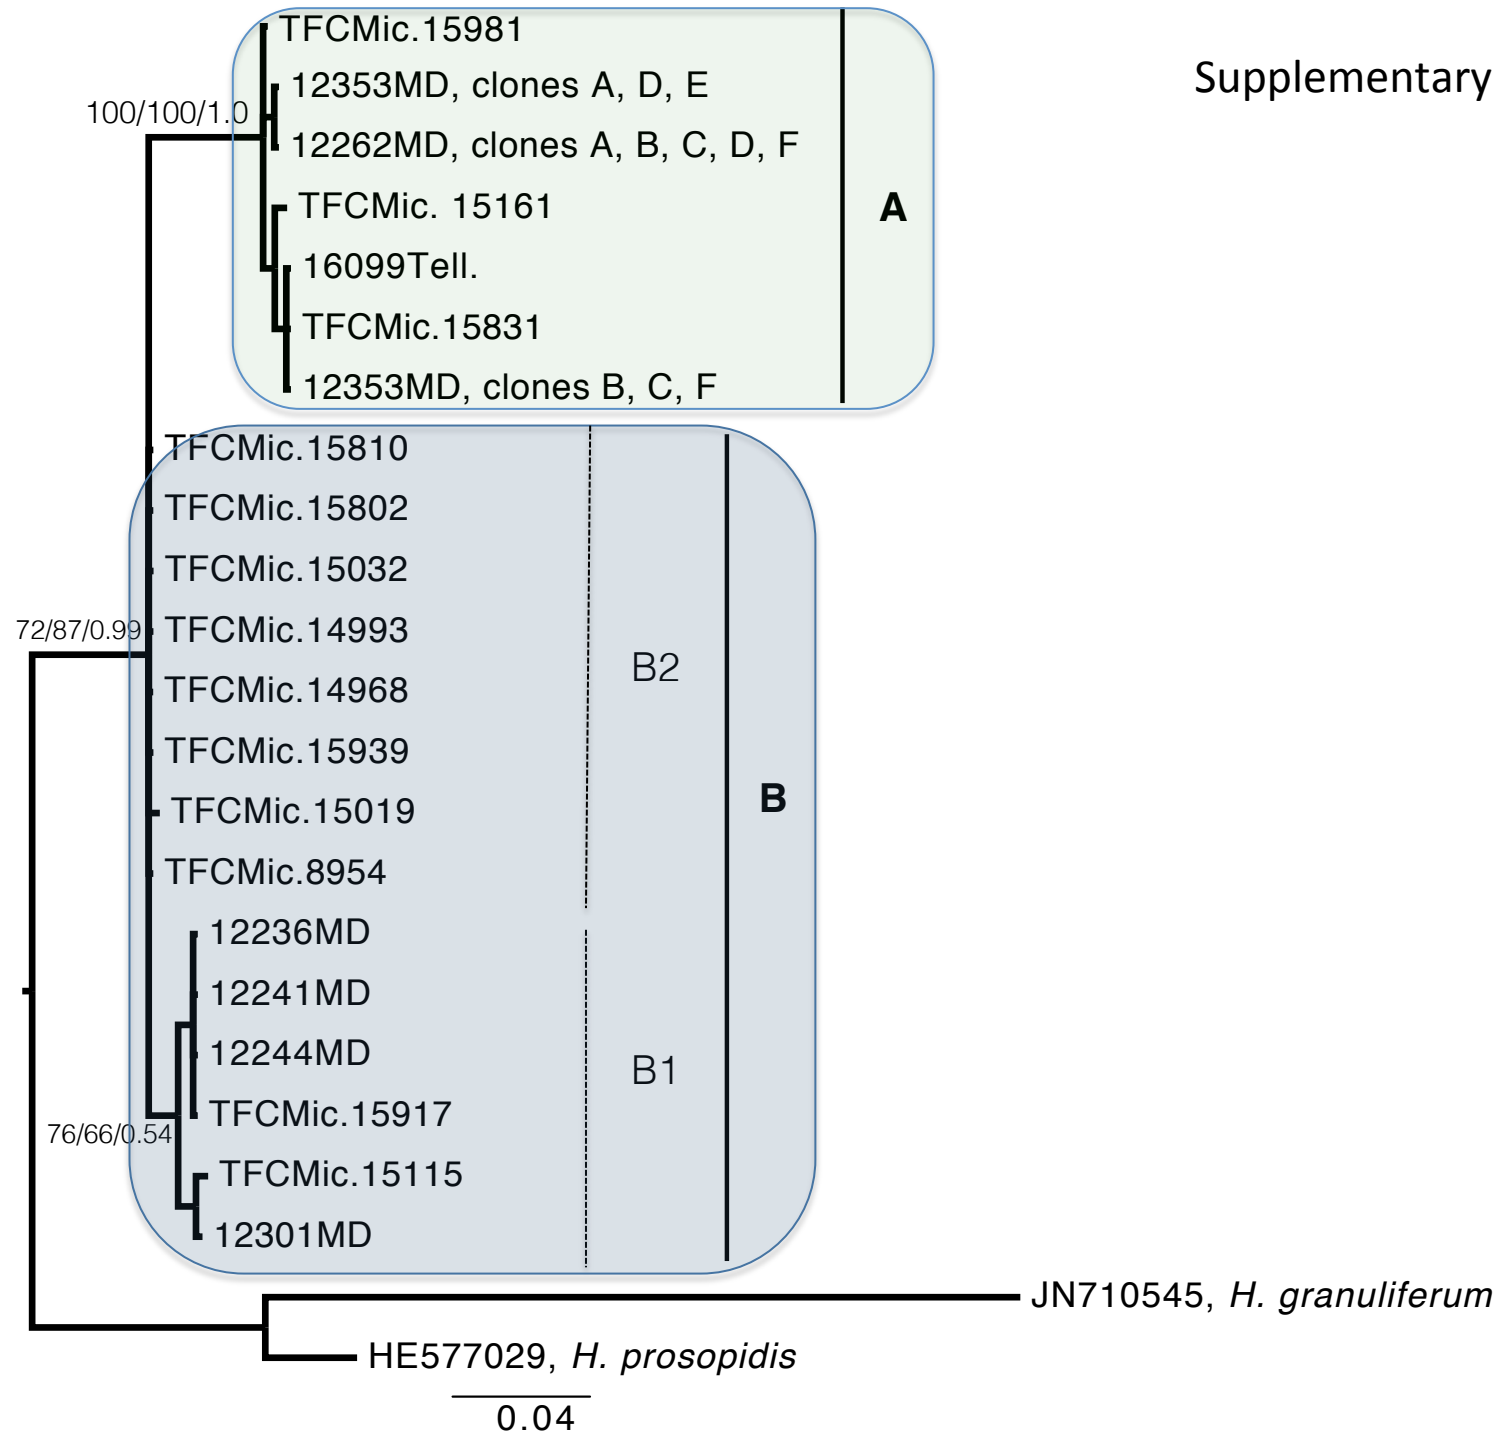

Supplementary Fig. 2B (IGS)

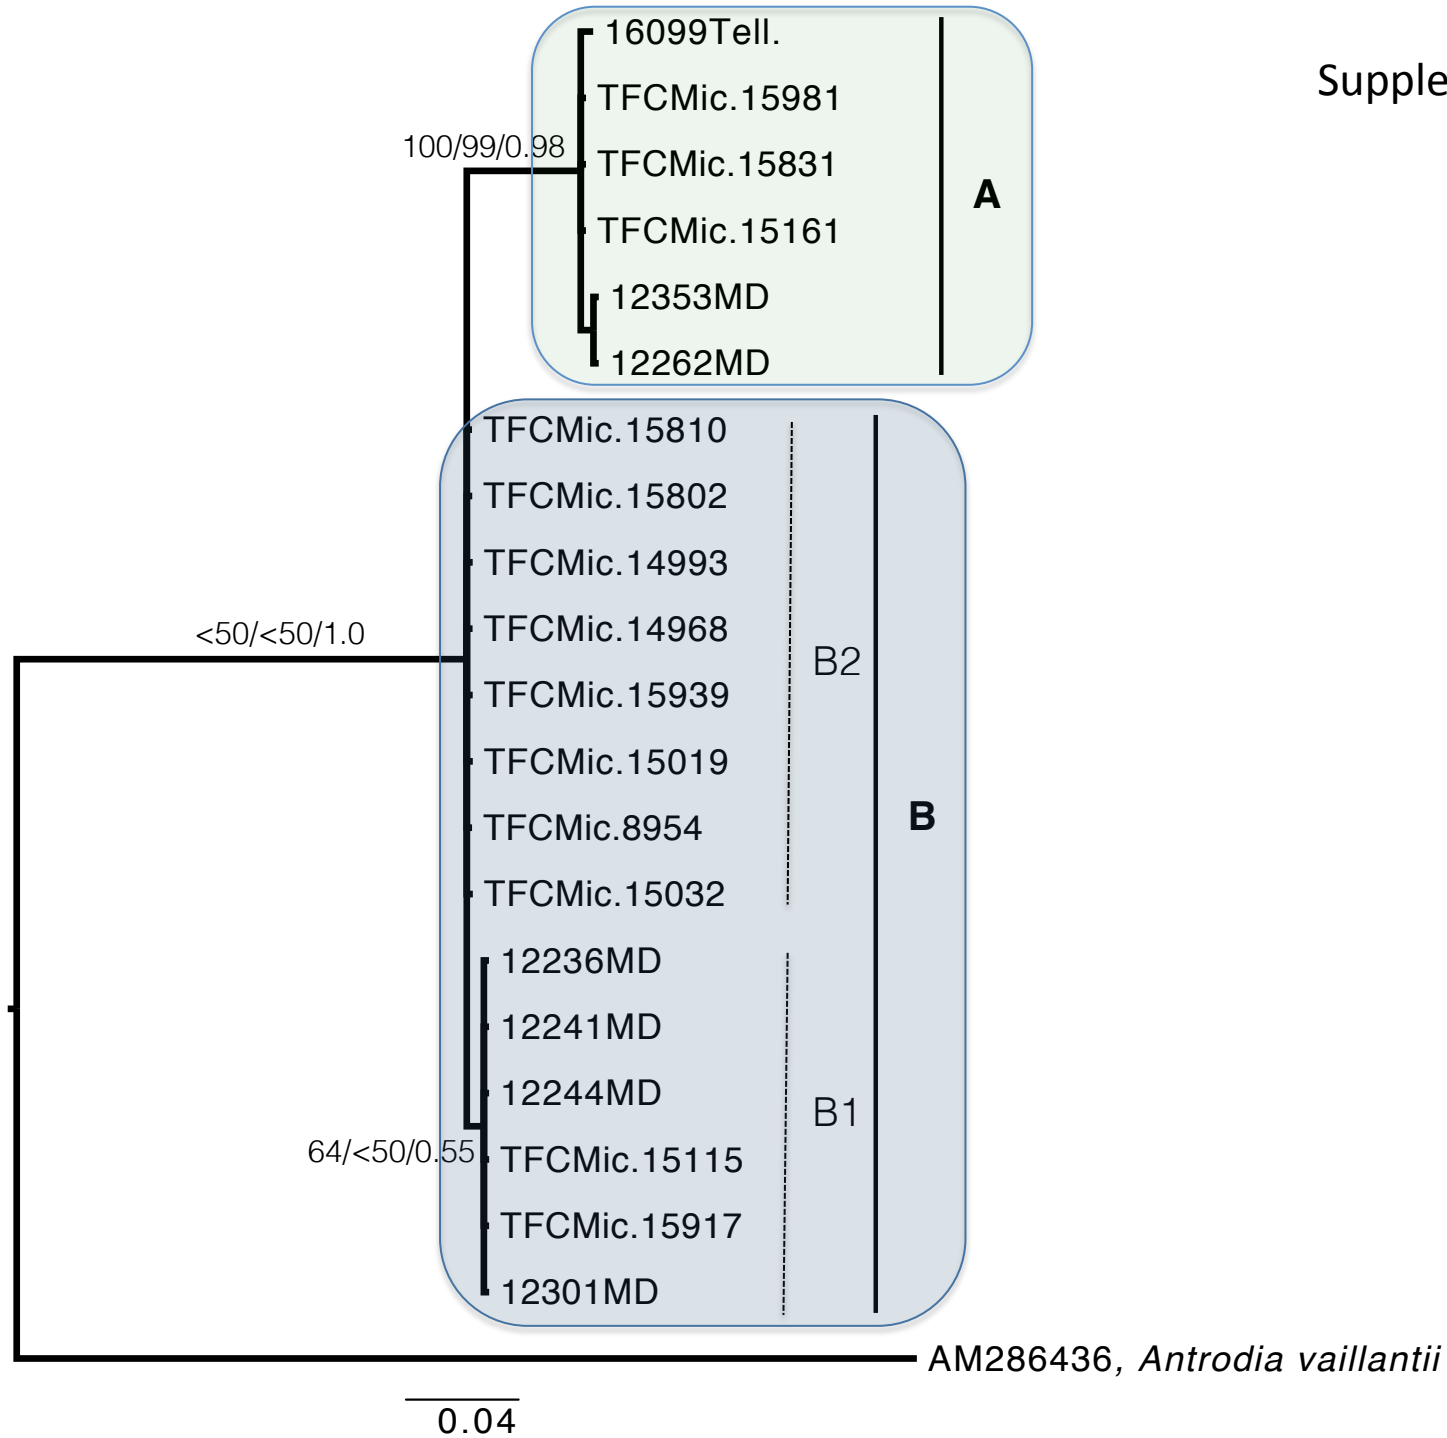

Supplementary Fig. 2C (RPB2)

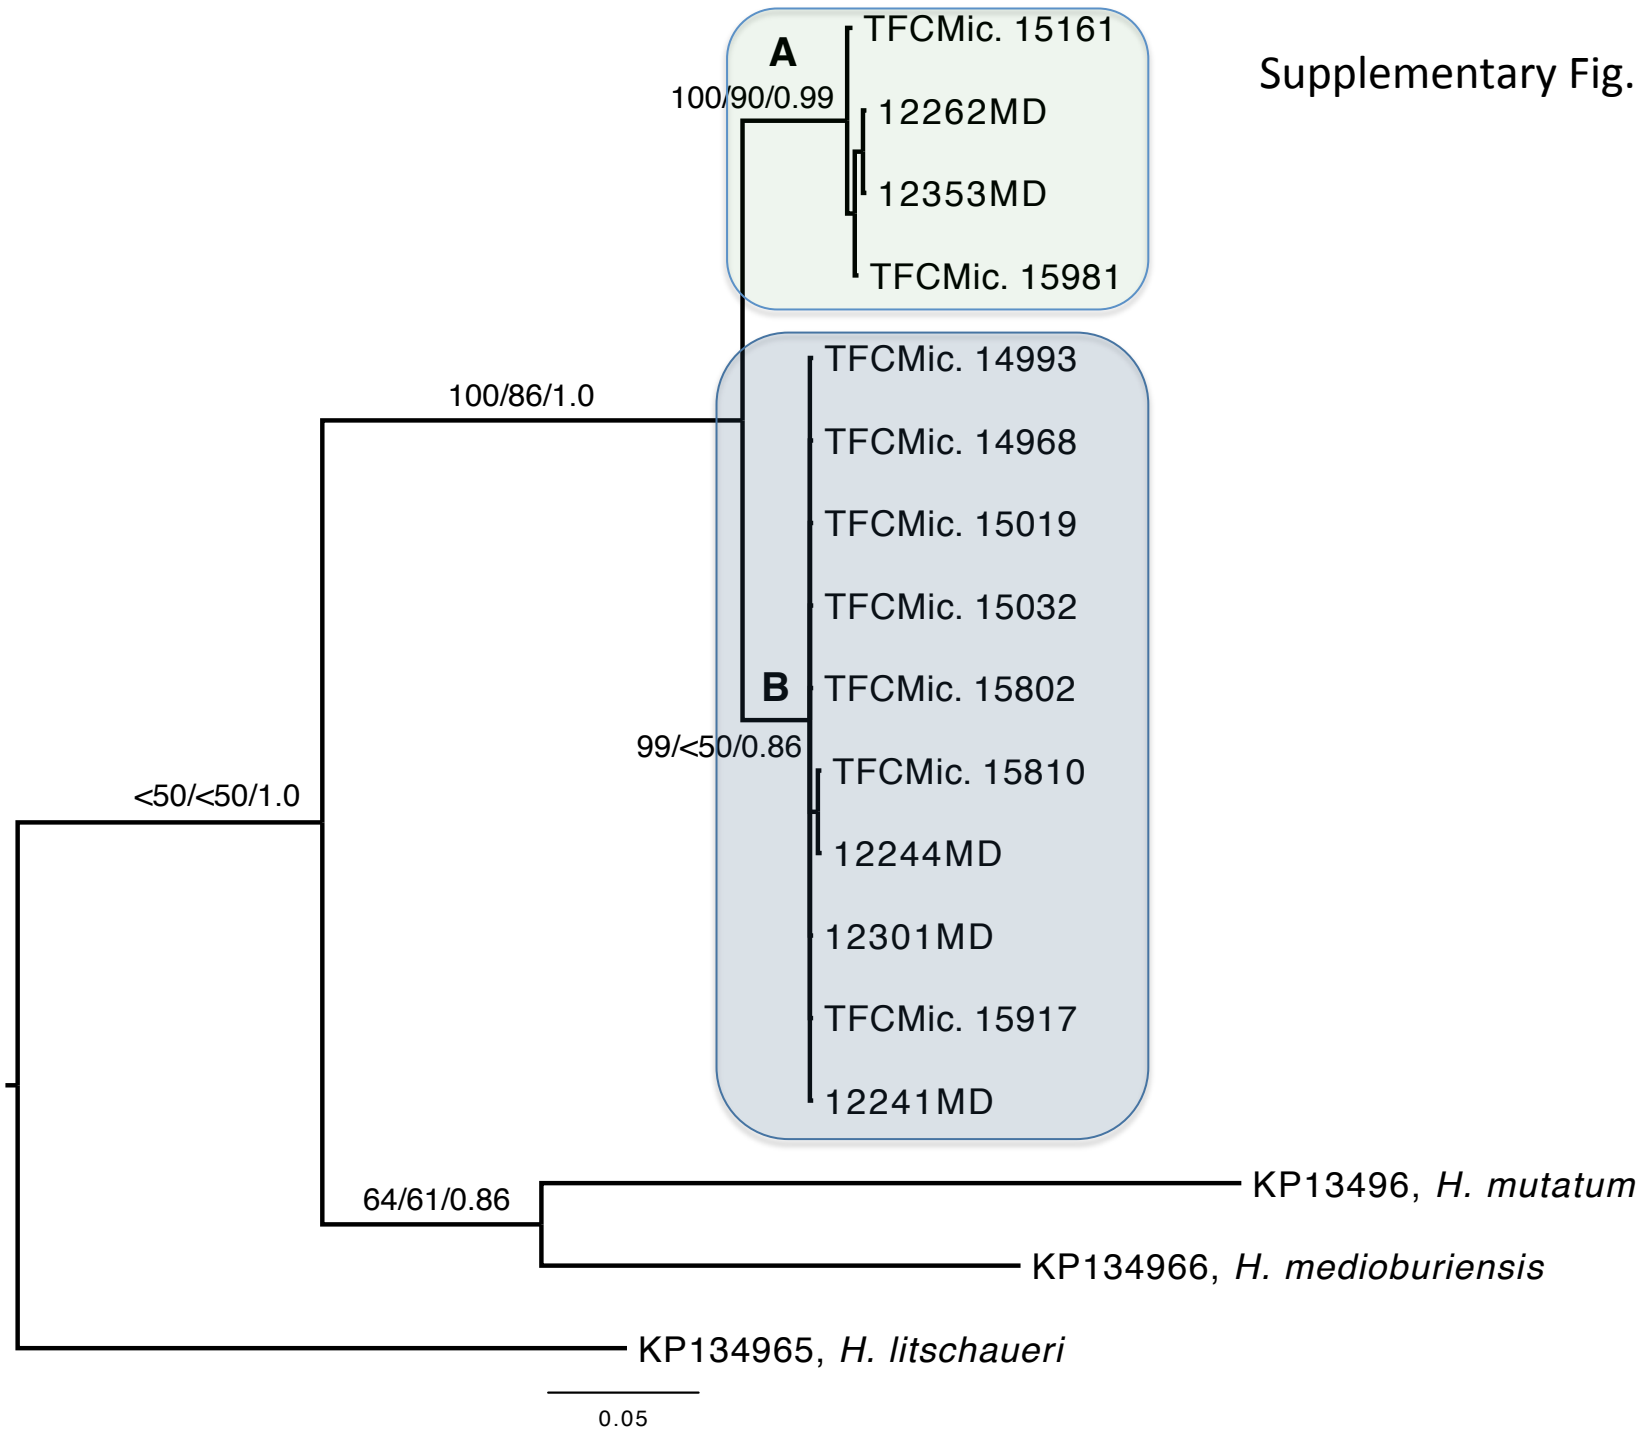

!"#\$%&'()\*+,-./0,12,34-5678,

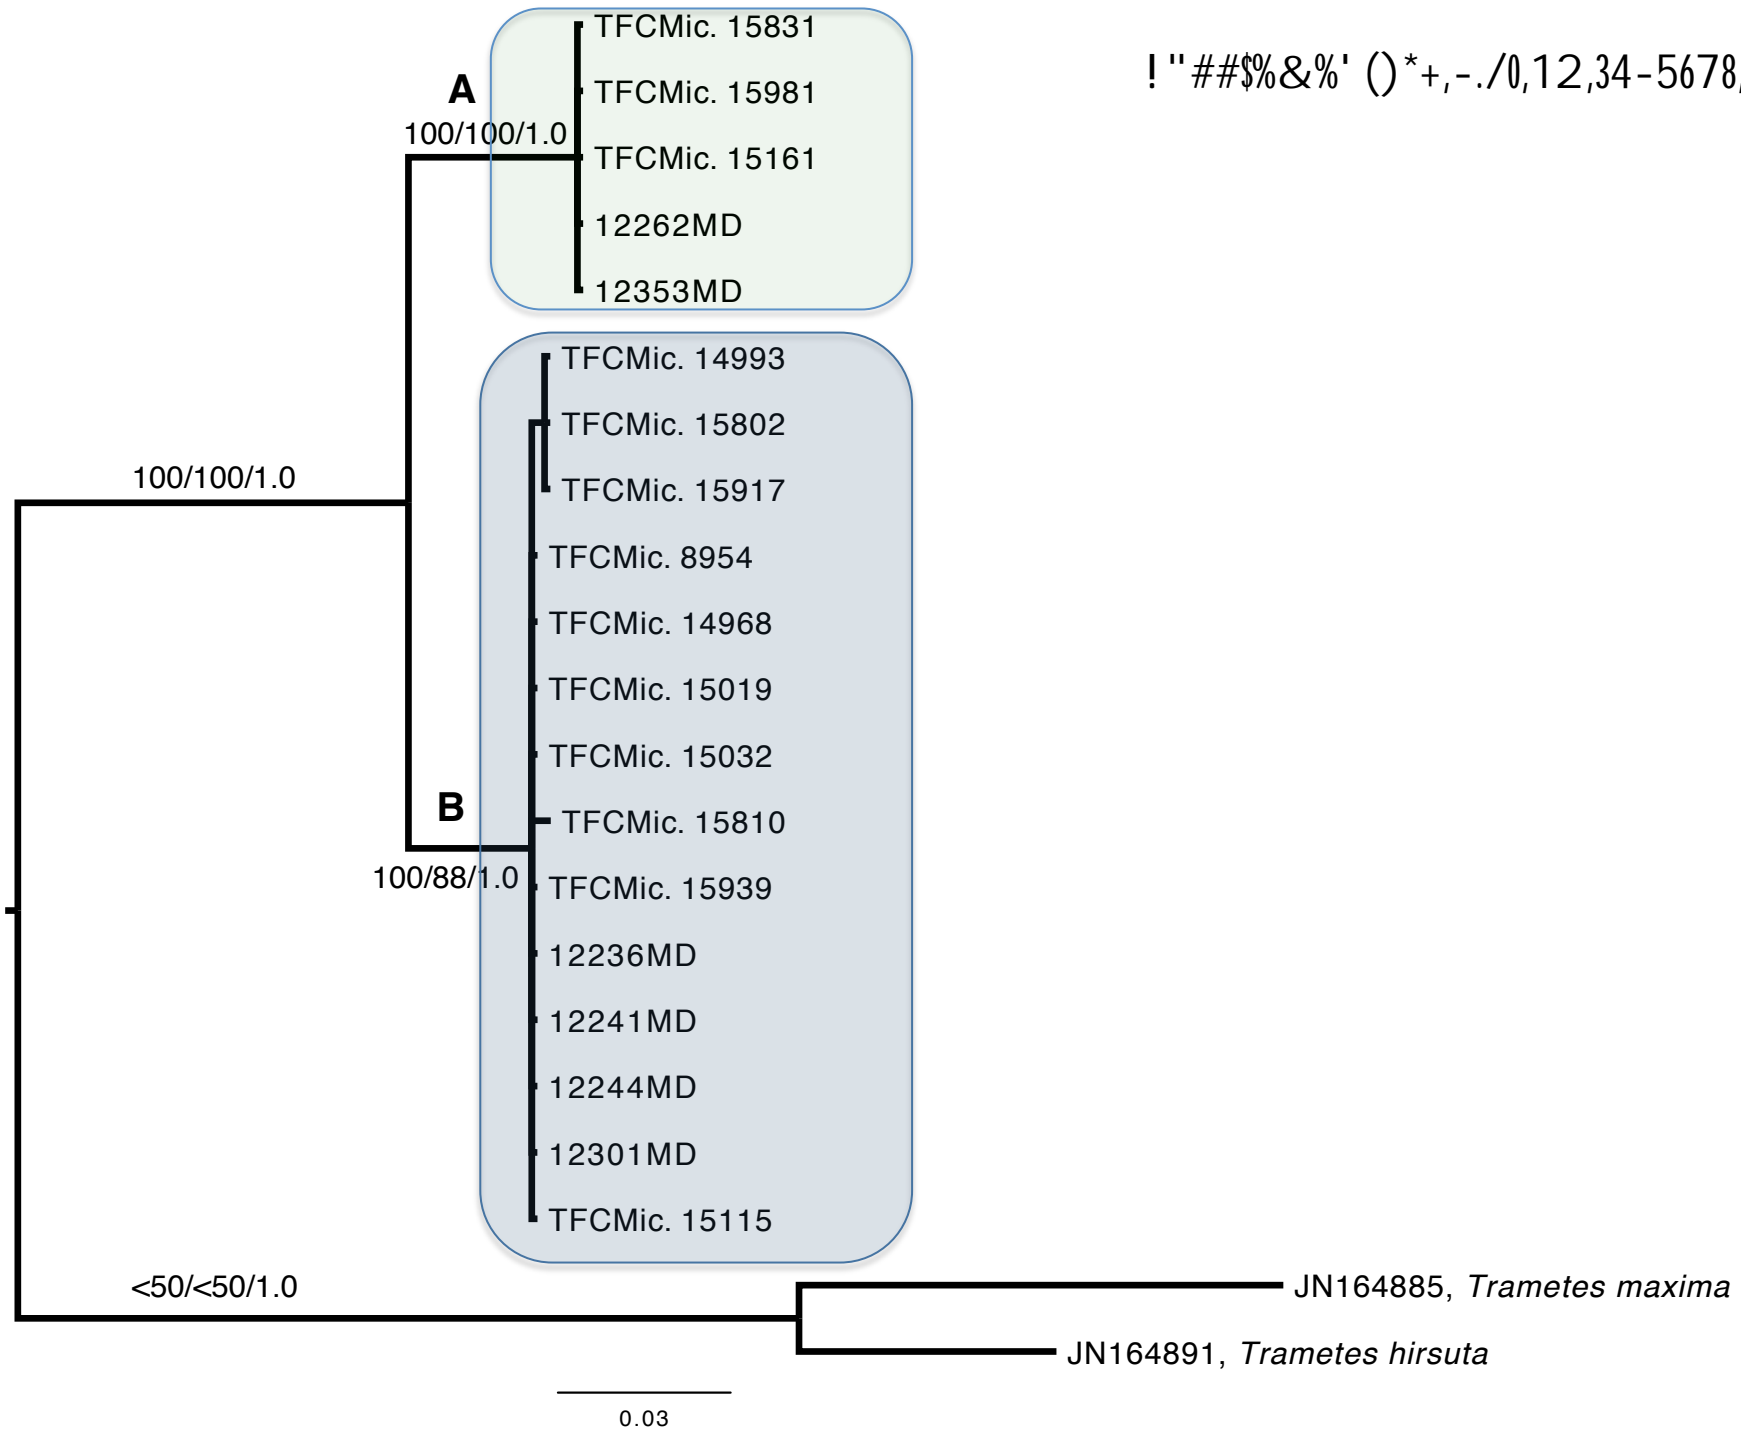

Supplement: SF2.pdf [file SF2.pdf]

# Supplementary Fig. 4

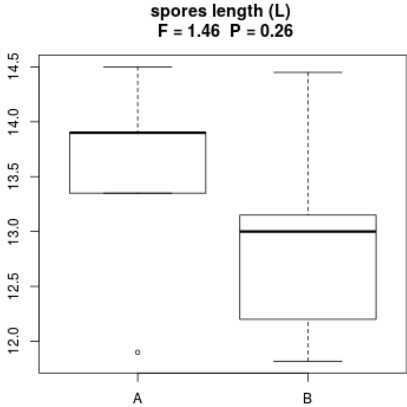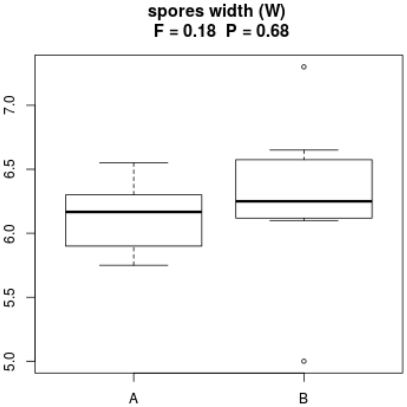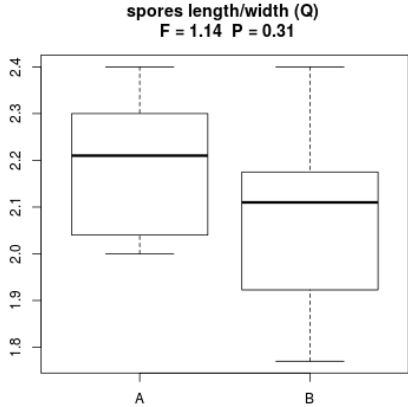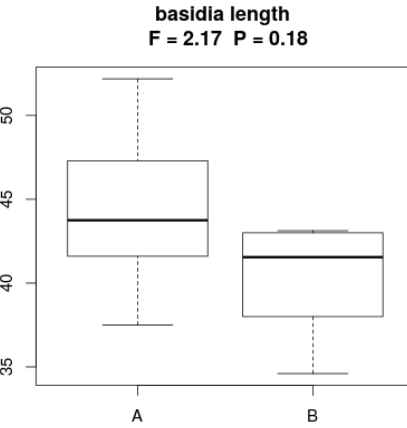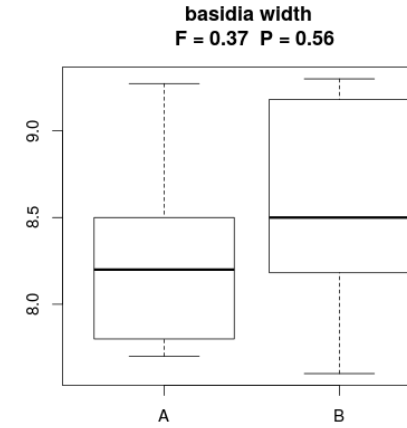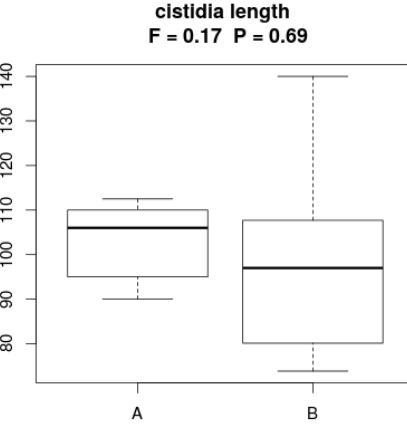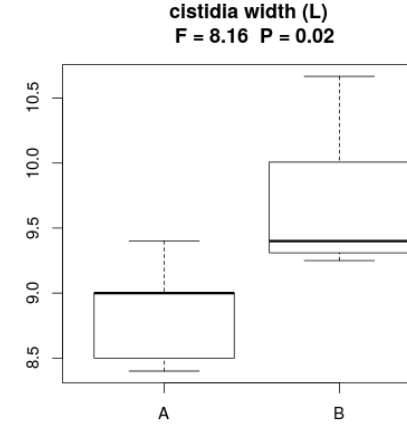

Supplement: SF4.pdf [file SF4.pdf]
